# Supplementary material for: Microencapsulated Tuna Oil Results in Higher Absorption of DHA in Toddlers
Source: MDPI journal article supplement (doi:10.3390/nu12010248), 2020-01-18
Supplement: s1 [file s1]

Supplementary Table 1. Estimated dietary intake of DHA, EPA, total n-3, total n-6 and n-6/n-3 in different countries in toddlers and young children

| Country        | Age group (year) | DHA (mg) | EPA (mg) | Total n-3 (g) | Total n-6 (g) | n-6/n-3 |
|----------------|------------------|----------|----------|---------------|---------------|---------|
| Australia [18] | 2-3              | 24       | 10       | 0.72          | 6.2           | 8.6*    |
| UK [19]        | 1-1.5            | -        | -        | 0.70          | 4.0           | 5.7*    |
|                | 1.5-3            | -        | -        | 0.80          | 4.7           | 5.8*    |
| US [20]        | 1-2              | 20       | 5        | 0.84          | 6.97          | 8.9     |
|                | 2-3              | 20.5     | 5.7      | 0.89          | 8.18          | 10      |
|                | 3-4              | 20.8     | 6.4      | 0.90          | 9.10          | 10.9    |
|                | 4-5              | 21       | 7.1      | 0.93          | 10.16         | 12      |
| Canada [21]    | 1.5-2            | 29       | 41       | -             | -             | -       |
|                | 2.1-3            | 57       | 95       | -             | -             | -       |
|                | 3.1-5            | 60       | 96       | -             | -             | -       |
| China [22]     | 1-3              | 34       | -        | 0.7           | 7             | 9.9     |
|                | 4-5              | 23       | -        | 0.9           | 10            | 6.6     |
| Korea [23]     | 2-4              | 37       | 22       | 0.6           | 4             | 8.3     |
| Japan [24]     | 1-2              | -        | -        | 1.1           | 5.1           | 4.6*    |
|                | 3-5              | -        | -        | 1.4           | 6.7           | 4.7*    |

\* These data not reported in the papers, simply calculated based on total n-3 and total n-6 data reported.

Supplementary Table 2. Bioavailability of encapsulated fish oil in human studies

| Age group     | Number                   | Duration       | Aim                                                                                                               | Dose                                                  | Bioavailability                                                               | Reference |
|---------------|--------------------------|----------------|-------------------------------------------------------------------------------------------------------------------|-------------------------------------------------------|-------------------------------------------------------------------------------|-----------|
| 21-64         | Acute: 6,<br>Chronic: 10 | 4 h<br>3 weeks | To assess the bioavailability of microencapsulated tuna oil in bread (no control group)                           | Acute: 80 mg n-3/single dose<br>Chronic: 60 mg n-3 /d | A low dose of omega-3 consumed as microencapsulate tuna oil was bioavailable. | [37]      |
| > 50          | 99                       | 4 weeks        | To assess the bioavailability of microencapsulated fish oil vs fish oil                                           | 1500 mg EPA+DHA/ d                                    | No significant difference                                                     | [42]      |
| Not specified | 6                        | 24 h           | To check the bioavailability of microencapsulated fish oil vs fish oil                                            | 4.5 g fish oil containing 20% EPA (900 mg EPA/ d)     | Encapsulated fish oil had better bioavailability compared with fish oil       | [43]      |
| 18-60         | 10                       | 48 h           | To assess the bioavailability of emulsified oil vs fish oil capsule                                               | 71.2 mg EPA + 44 mg DHA daily                         | Emulsified fish oil had better bioavailability compared with fish oil capsule | [44]      |
| 19-29         | 28                       | 4 weeks        | To assess the bioavailability of microencapsulated fish oil vs fish oil capsule                                   | 900 mg n-3 /d                                         | No significant difference                                                     | [45]      |
| 20-82         | 6                        | 2 weeks        | To assess the bioavailability of microencapsulated tuna oil vs capsular tuna oil in juice, cereal bar and yogurt. | 250 mg n-3 /d                                         | No significant difference                                                     | [28]      |
| 30-60         | 14                       | 3 weeks        | To assess the bioavailability of microencapsulated fish oil vs capsular fish oil in ethyl ester form              | 800 mg DHA + 1088 mg EPA daily                        | No significant difference                                                     | [48]      |
| 20-26         | 25                       | 4 weeks        | To assess the bioavailability of microencapsulated fish oil vs capsular fish oil.                                 | 900 mg n-3 / d                                        | No significant difference                                                     | [47]      |
